# Supplementary material for: Seasonal Changes in the Biochemical Constituents of Green Seaweed Chaetomorpha antennina from Covelong, India
Source: MDPI journal article supplement (doi:10.3390/biom12101475), 2022-10-13
Supplement: s1 [file s1]

### Supplementary files

**Table S1.** Water quality parameters at the time of sample collection in the study site. Values are average  $\pm$ SE values are given in table, n= 3.

|            | Light<br>(LUX)      | Temperature<br>(°C) | DO<br>(mL/L)  | pH              | Salinity<br>(PPT) | Ammonia<br>( $\mu$ M) | Nitrite<br>( $\mu$ M) | Nitrate<br>( $\mu$ M) |
|------------|---------------------|---------------------|---------------|-----------------|-------------------|-----------------------|-----------------------|-----------------------|
| 19/6/2019  | 530100 $\pm$ 115000 | 29.4 $\pm$ 0.2      | 7.7 $\pm$ 0.1 | 8.13 $\pm$ 0.03 | 33.1 $\pm$ 0.1    | 0.06 $\pm$ 0.01       | 0.02 $\pm$ 0          | 0.06 $\pm$ 0.03       |
| 04/07/2019 | 476100 $\pm$ 12000  | 28.8 $\pm$ 0.3      | 5.8 $\pm$ 0.1 | 8.15 $\pm$ 0.02 | 32.6 $\pm$ 0.1    | 0.04 $\pm$ 0.01       | 0.02 $\pm$ 0          | 0.92 $\pm$ 0.04       |
| 02/08/2019 | 365100 $\pm$ 1000   | 28.9 $\pm$ 0.2      | 7.7 $\pm$ 0.1 | 8.14 $\pm$ 0.05 | 33.45 $\pm$ 0.05  | 0.2 $\pm$ 0.01        | 0.01 $\pm$ 0          | 1.38 $\pm$ 0.08       |
| 27/09/2019 | 638600 $\pm$ 198500 | 29.1 $\pm$ 0.1      | 7 $\pm$ 0.3   | 8.12 $\pm$ 0.02 | 32.8 $\pm$ 0.2    | 0.23 $\pm$ 0.03       | 0.05 $\pm$ 0.01       | 0.78 $\pm$ 0.07       |
| 31/10/2019 | 372600 $\pm$ 102500 | 29.1 $\pm$ 0.3      | 6.9 $\pm$ 0   | 7.98 $\pm$ 0.02 | 30.75 $\pm$ 0.25  | 0.015 $\pm$ 0.009     | 0.008 $\pm$ 0.003     | 0.42 $\pm$ 0.142      |
| 12/11/2019 | 341600 $\pm$ 270500 | 28.4 $\pm$ 0.2      | 6.6 $\pm$ 0.3 | 8.07 $\pm$ 0.01 | 30.2 $\pm$ 0.2    | 0.02 $\pm$ 0.004      | 0 $\pm$ 0.002         | 0.83 $\pm$ 0.083      |
| 12/12/2019 | 619600 $\pm$ 198500 | 27.1 $\pm$ 0.2      | 6.9 $\pm$ 0   | 7.98 $\pm$ 0.03 | 29.35 $\pm$ 0.15  | 0.02 $\pm$ 0.002      | 0.01 $\pm$ 0.002      | 0.45 $\pm$ 0.07       |
| 29/01/2020 | 886100 $\pm$ 289000 | 26.9 $\pm$ 0.2      | 7.2 $\pm$ 0.2 | 8.1 $\pm$ 0.04  | 29.9 $\pm$ 0.1    | 0.42 $\pm$ 0.01       | 0.04 $\pm$ 0.01       | 1.31 $\pm$ 0.07       |
| 22/02/2020 | 926600 $\pm$ 29500  | 27.4 $\pm$ 0.2      | 4.7 $\pm$ 0.1 | 8.14 $\pm$ 0.05 | 30.15 $\pm$ 0.15  | 0.52 $\pm$ 0.07       | 0.02 $\pm$ 0.01       | 1.97 $\pm$ 0.15       |
| 01/03/2020 | 806600 $\pm$ 170500 | 28.3 $\pm$ 0.2      | 7.4 $\pm$ 0   | 8.12 $\pm$ 0.08 | 31.9 $\pm$ 0.1    | 0.68 $\pm$ 0.01       | 0.07 $\pm$ 0.01       | 2.76 $\pm$ 0.04       |

**Measurement of Physico-chemical parameters:** At the time of sample collection, the light was measured using a Lux meter (Lutron LX 101A) and, temperature, pH, salinity, dissolved oxygen were measured using a combo water quality meter (AZ 86031, M&A instruments, USA). Nitrate concentration in the water samples was measured through a spectrophotometer using standard procedures.

**Table S2.** Month wise variations in the carbohydrate content of *C. antennina*. Values are average  $\pm$ SE values are given in table, n= 3.

|                        | June'19           | July'19          | Aug'19            | Sep'19           | Oct'19             | Nov'19             | Dec'19             | Jan'20            | Feb'20            | Mar'20             |
|------------------------|-------------------|------------------|-------------------|------------------|--------------------|--------------------|--------------------|-------------------|-------------------|--------------------|
| <b>Rhamnose</b>        | 27.29 $\pm$ 0.24  | 33.1 $\pm$ 1.05  | 35.4 $\pm$ 3.05   | 46.09 $\pm$ 3.15 | 39.78 $\pm$ 1.47   | 50.93 $\pm$ 1.05   | 57.53 $\pm$ 0.93   | 52.34 $\pm$ 0.51  | 42.54 $\pm$ 1.33  | 49.83 $\pm$ 1.26   |
| <b>Arabinose</b>       | 0.04 $\pm$ 0      | 0.05 $\pm$ 0     | 0.05 $\pm$ 0      | 0.07 $\pm$ 0.01  | 0.08 $\pm$ 0.01    | 0.1 $\pm$ 0        | 0.12 $\pm$ 0.01    | 0.08 $\pm$ 0      | 0.09 $\pm$ 0.01   | 0.03 $\pm$ 0.01    |
| <b>Galactose</b>       | 3.73 $\pm$ 0.04   | 3.98 $\pm$ 0.17  | 4.95 $\pm$ 0.15   | 7.12 $\pm$ 1.1   | 7 $\pm$ 0.2        | 7.92 $\pm$ 1       | 9.77 $\pm$ 0.32    | 7.07 $\pm$ 0.08   | 7.4 $\pm$ 0.26    | 7.12 $\pm$ 1.1     |
| <b>Glucose</b>         | 49.57 $\pm$ 2.09  | 45.42 $\pm$ 2.84 | 54.47 $\pm$ 3.12  | 70.05 $\pm$ 12.7 | 66.73 $\pm$ 4.57   | 74.35 $\pm$ 4.72   | 62.02 $\pm$ 6.87   | 77.29 $\pm$ 7.81  | 96.04 $\pm$ 8.89  | 80.1 $\pm$ 5.06    |
| <b>Xylose</b>          | 16.38 $\pm$ 1.56  | 18.26 $\pm$ 0.4  | 23.67 $\pm$ 1.81  | 25.86 $\pm$ 0.36 | 30.98 $\pm$ 3.22   | 32.71 $\pm$ 3.68   | 35.2 $\pm$ 0.89    | 38.18 $\pm$ 3.75  | 34.84 $\pm$ 1.04  | 43.86 $\pm$ 2.77   |
| <b>Glucuronic acid</b> | 13.87 $\pm$ 0.76  | 12 $\pm$ 0.73    | 18.35 $\pm$ 2.09  | 28.3 $\pm$ 3.03  | 16.36 $\pm$ 0.19   | 26.79 $\pm$ 1.74   | 22 $\pm$ 0.63      | 24.4 $\pm$ 2.01   | 28.35 $\pm$ 3.45  | 21.31 $\pm$ 0.26   |
| <b>Total</b>           | 106.17 $\pm$ 4.46 | 97.46 $\pm$ 6.01 | 116.96 $\pm$ 6.54 | 150.18 $\pm$ 27  | 157.72 $\pm$ 11.35 | 159.84 $\pm$ 10.26 | 134.22 $\pm$ 14.51 | 151.68 $\pm$ 21.9 | 172.53 $\pm$ 15.9 | 170.82 $\pm$ 10.77 |

**Table S3.** Month wise variations in the amino acid content of *C. antennina*. Values are average  $\pm$ SE values are given in table, n= 3.

|                      | June'19                | July'19               | Aug'19                | Sep'19                | Oct'19                 | Nov'19                 | Dec'19                 | Jan'20                 | Feb'20                 | Mar'20                 |
|----------------------|------------------------|-----------------------|-----------------------|-----------------------|------------------------|------------------------|------------------------|------------------------|------------------------|------------------------|
| <b>Proline</b>       | 114 $\pm$ 15.2<br>3    | 179.17 $\pm$<br>7.45  | 220.17 $\pm$ 5.<br>42 | 156.99 $\pm$ 7.<br>31 | 122.54 $\pm$ 27<br>.79 | 112.95 $\pm$ 22<br>.1  | 154.28 $\pm$ 22<br>.32 | 184.21 $\pm$ 10<br>.29 | 195.08 $\pm$ 5.48      | 187.68 $\pm$ 1<br>2.76 |
| <b>Glycine</b>       | 7.61 $\pm$ 0.16        | 8.64 $\pm$ 0.<br>7    | 8.94 $\pm$ 0.24       | 8.34 $\pm$ 0.24       | 8 $\pm$ 1.2            | 7.25 $\pm$ 1.5         | 7.87 $\pm$ 1.84        | 7.74 $\pm$ 1.66        | 10.17 $\pm$ 1.79       | 13.93 $\pm$ 0.<br>96   |
| <b>Serine</b>        | 6.49 $\pm$ 0.17        | 6.12 $\pm$ 0.<br>57   | 6.59 $\pm$ 0.18       | 6.95 $\pm$ 0.18       | 6.11 $\pm$ 1.1         | 5.99 $\pm$ 1.42        | 5.9 $\pm$ 1.54         | 6.17 $\pm$ 1.17        | 8.07 $\pm$ 1.68        | 7.93 $\pm$ 1.0<br>1    |
| <b>Argnine</b>       | 29.76 $\pm$ 1.6<br>4   | 45.55 $\pm$ 1<br>.77  | 30.54 $\pm$ 2.7<br>1  | 21.14 $\pm$ 0.5<br>9  | 16.84 $\pm$ 5.2<br>8   | 27.41 $\pm$ 5.6<br>6   | 36.66 $\pm$ 4.6<br>5   | 27.75 $\pm$ 4.8<br>8   | 29.5 $\pm$ 7.29        | 42.71 $\pm$ 4.<br>32   |
| <b>Ornithine</b>     | 173.38 $\pm$ 1<br>3.93 | 248.86 $\pm$<br>12.37 | 152.35 $\pm$ 8.<br>5  | 145.14 $\pm$ 7.<br>65 | 100.42 $\pm$ 29<br>.59 | 158.62 $\pm$ 30<br>.27 | 205.16 $\pm$ 28<br>.14 | 153.32 $\pm$ 26<br>.84 | 172.7 $\pm$ 39.57      | 242.52 $\pm$ 2<br>4.96 |
| <b>Glutamine</b>     | 282.09 $\pm$ 1<br>1.3  | 399.88 $\pm$<br>13.29 | 262.79 $\pm$ 2<br>2.3 | 229.82 $\pm$ 5.<br>19 | 244.59 $\pm$ 1.<br>66  | 435.67 $\pm$ 31<br>.16 | 395.22 $\pm$ 48<br>.5  | 397.33 $\pm$ 28<br>.1  | 453.51 $\pm$ 21.1<br>7 | 553.93 $\pm$ 1<br>9.48 |
| <b>Glutamate</b>     | 117.14 $\pm$ 0.<br>21  | 106.42 $\pm$<br>9.2   | 95.72 $\pm$ 4.7<br>4  | 105.02 $\pm$ 2.<br>14 | 121.59 $\pm$ 9.<br>85  | 128.83 $\pm$ 4.<br>72  | 158.56 $\pm$ 8.<br>45  | 161.33 $\pm$ 17<br>.07 | 166.95 $\pm$ 6.87      | 207.1 $\pm$ 8.<br>7    |
| <b>Aspartate</b>     | 6.28 $\pm$ 0.35        | 5.17 $\pm$ 1.<br>01   | 22.34 $\pm$ 16.<br>13 | 26.55 $\pm$ 17.<br>67 | 7.69 $\pm$ 1.34        | 7.72 $\pm$ 0.62        | 6.54 $\pm$ 1.87        | 7.72 $\pm$ 0.93        | 10.27 $\pm$ 1.22       | 9.51 $\pm$ 1.0<br>1    |
| <b>Cystine</b>       | 0.22 $\pm$ 0.11        | 0.47 $\pm$ 0.<br>07   | 0.06 $\pm$ 0.01       | 0.07 $\pm$ 0.01       | 0.05 $\pm$ 0.01        | 0.15 $\pm$ 0.06        | 0.29 $\pm$ 0.04        | 0.24 $\pm$ 0.02        | 0.14 $\pm$ 0.05        | 0.3 $\pm$ 0.05         |
| <b>Asparagine</b>    | 0.1 $\pm$ 0.001        | 0.11 $\pm$ 0.<br>01   | 0.03 $\pm$ 0.00<br>3  | 0.1 $\pm$ 0.01        | 0.09 $\pm$ 0.02        | 0.09 $\pm$ 0.01        | 0.09 $\pm$ 0.01        | 0.11 $\pm$ 0.01        | 0.12 $\pm$ 0.02        | 0.12 $\pm$ 0.0<br>1    |
| <b>Leucine</b>       | 0.06 $\pm$ 0.02        | 0.07 $\pm$ 0.<br>003  | 0.01 $\pm$ 0.00<br>2  | 0.12 $\pm$ 0.01       | 0.08 $\pm$ 0.02        | 0.07 $\pm$ 0.01        | 0.29 $\pm$ 0.21        | 0.29 $\pm$ 0.22        | 0.1 $\pm$ 0.01         | 0.24 $\pm$ 0.1<br>4    |
| <b>Lysine</b>        | 0.26 $\pm$ 0.02        | 0.2 $\pm$ 0.0<br>1    | 0.05 $\pm$ 0.00<br>1  | 0.31 $\pm$ 0.01       | 0.25 $\pm$ 0.05        | 0.25 $\pm$ 0.06        | 0.22 $\pm$ 0.06        | 0.3 $\pm$ 0.02         | 0.34 $\pm$ 0.07        | 0.32 $\pm$ 0.0<br>4    |
| <b>Histidine</b>     | 0.22 $\pm$ 0.01        | 0.15 $\pm$ 0.<br>01   | 0.05 $\pm$ 0.00<br>03 | 0.27 $\pm$ 0.00<br>4  | 0.22 $\pm$ 0.04        | 0.21 $\pm$ 0.04        | 0.17 $\pm$ 0.04        | 0.2 $\pm$ 0.04         | 0.29 $\pm$ 0.05        | 0.26 $\pm$ 0.0<br>3    |
| <b>Alanine</b>       | 1.15 $\pm$ 0.4         | 2.11 $\pm$ 0.<br>24   | 0.3 $\pm$ 0.05        | 0.59 $\pm$ 0.05       | 0.47 $\pm$ 0.11        | 0.86 $\pm$ 0.28        | 1.41 $\pm$ 0.21        | 1.23 $\pm$ 0.1         | 0.88 $\pm$ 0.26        | 1.51 $\pm$ 0.2<br>1    |
| <b>Isoleucine</b>    | 0.63 $\pm$ 0.05        | 0.68 $\pm$ 0.<br>03   | 0.16 $\pm$ 0.01       | 0.88 $\pm$ 0.09       | 0.68 $\pm$ 0.13        | 0.63 $\pm$ 0.08        | 0.64 $\pm$ 0.11        | 0.63 $\pm$ 0.16        | 0.88 $\pm$ 0.14        | 0.85 $\pm$ 0.0<br>6    |
| <b>Methionine</b>    | 2.04 $\pm$ 0.39        | 1.52 $\pm$ 0.<br>2    | 0.44 $\pm$ 0.02       | 2.66 $\pm$ 0.08       | 2.15 $\pm$ 0.42        | 1.95 $\pm$ 0.32        | 3.39 $\pm$ 1.75        | 1.87 $\pm$ 0.37        | 2.73 $\pm$ 0.49        | 3.56 $\pm$ 0.9<br>8    |
| <b>Threonine</b>     | 4.04 $\pm$ 0.14        | 2.8 $\pm$ 0.1<br>7    | 0.69 $\pm$ 0.01       | 4.32 $\pm$ 0.15       | 3.51 $\pm$ 0.67        | 5.44 $\pm$ 0.85        | 3.18 $\pm$ 0.88        | 3.45 $\pm$ 0.61        | 5.97 $\pm$ 0.13        | 5.75 $\pm$ 0.9<br>6    |
| <b>Valine</b>        | 4.69 $\pm$ 1.41        | 15.3 $\pm$ 2.<br>08   | 2.54 $\pm$ 0.36       | 6.07 $\pm$ 0.74       | 4.96 $\pm$ 0.95        | 4.49 $\pm$ 0.78        | 10.69 $\pm$ 2.1<br>4   | 9.96 $\pm$ 0.43        | 6.3 $\pm$ 0.75         | 10.12 $\pm$ 0.<br>91   |
| <b>Phenylalanine</b> | 7.37 $\pm$ 0.26        | 15.82 $\pm$ 1<br>.62  | 2.48 $\pm$ 0.26       | 7.82 $\pm$ 0.41       | 6.16 $\pm$ 1.33        | 6.84 $\pm$ 1.18        | 11.63 $\pm$ 1.9<br>9   | 8.78 $\pm$ 2.29        | 8.67 $\pm$ 1.67        | 12.31 $\pm$ 0.<br>89   |
| <b>Tyrosine</b>      | 11.32 $\pm$ 1.9<br>7   | 9.86 $\pm$ 0.<br>85   | 1.11 $\pm$ 0.11       | 15.74 $\pm$ 0.5<br>3  | 12.36 $\pm$ 2.3        | 27.43 $\pm$ 14.<br>68  | 12.09 $\pm$ 1.0<br>8   | 12.83 $\pm$ 1.2<br>5   | 26.52 $\pm$ 8.34       | 25.26 $\pm$ 10<br>.18  |

**Table S4.** Month wise variations in the fatty acids content of *C. antennina*. Values are average  $\pm$ SE values are given in table, n= 3.

|                                 | June'19             | July'19              | Aug'19             | Sep'19             | Oct'19             | Nov'19             | Dec'19              | Jan'20             | Feb'20               | Mar'20            |
|---------------------------------|---------------------|----------------------|--------------------|--------------------|--------------------|--------------------|---------------------|--------------------|----------------------|-------------------|
| <b>Dodecanoic (C12:0)</b>       | 0.21 $\pm$ 0.002    | 0.25 $\pm$ 0.008     | 0.3 $\pm$ 0.009    | 0.4 $\pm$ 0.043    | 0.43 $\pm$ 0.016   | 0.66 $\pm$ 0.006   | 0.63 $\pm$ 0.001    | 0.78 $\pm$ 0.002   | 0.46 $\pm$ 0.014     | 0.44 $\pm$ 0.0221 |
| <b>Tetradecanoic (C14:0)</b>    | 0.01 $\pm$ 0.0003   | 0.01 $\pm$ 0.001     | 0.01 $\pm$ 0.001   | 0.02 $\pm$ 0.001   | 0.02 $\pm$ 0.002   | 0.02 $\pm$ 0.001   | 0.03 $\pm$ 0.003    | 0.02 $\pm$ 0.001   | 0.02 $\pm$ 0.002     | 0.01 $\pm$ 0.001  |
| <b>Pentadecanoic (C15:0)</b>    | 0.01 $\pm$ 0.002    | 0.01 $\pm$ 0.001     | 0.02 $\pm$ 0.001   | 0.03 $\pm$ 0.004   | 0.02 $\pm$ 0.001   | 0.03 $\pm$ 0.001   | 0.03 $\pm$ 0.001    | 0.02 $\pm$ 0.003   | 0.03 $\pm$ 0.001     | 4.64 $\pm$ 0.633  |
| <b>Hexadecanoic (C16:0)</b>     | 7.66 $\pm$ 0.32     | 7.02 $\pm$ 0.44      | 8.42 $\pm$ 0.48    | 10.83 $\pm$ 1.96   | 11.34 $\pm$ 0.82   | 11.49 $\pm$ 0.73   | 9.59 $\pm$ 1.06     | 8.58 $\pm$ 3.6     | 14.84 $\pm$ 1.37     | 11.8 $\pm$ 6.19   |
| <b>Hexadecanoic (C16:1)</b>     | 0.06 $\pm$ 0.006    | 0.07 $\pm$ 0.002     | 0.09 $\pm$ 0.007   | 0.1 $\pm$ 0.001    | 0.13 $\pm$ 0.001   | 0.13 $\pm$ 0.023   | 0.12 $\pm$ 0.002    | 0.12 $\pm$ 0.012   | 0.13 $\pm$ 0.004     | 0.12 $\pm$ 0.058  |
| <b>Hexadecadienoic (C16:2)</b>  | 0.01 $\pm$ 0.0003   | 0 $\pm$ 0.0003       | 0.01 $\pm$ 0.001   | 0.01 $\pm$ 0.002   | 0.01 $\pm$ 0.001   | 0.01 $\pm$ 0.002   | 0.01 $\pm$ 0.004    | 0.01 $\pm$ 0.001   | 0.01 $\pm$ 0.001     | 0.004 $\pm$ 0.001 |
| <b>Hexadecatrienoic (C16:3)</b> | 0.01 $\pm$ 0.002    | 0.01 $\pm$ 0.001     | 0.01 $\pm$ 0.002   | 0.01 $\pm$ 0.002   | 0.01 $\pm$ 0.001   | 0.01 $\pm$ 0.001   | 0.01 $\pm$ 0.002    | 0.01 $\pm$ 0.003   | 0.01 $\pm$ 0.0002    | 0.13 $\pm$ 0.122  |
| <b>Heptadecanoic (C17:0)</b>    | 0.18 $\pm$ 0.001    | 0.16 $\pm$ 0.003     | 0.24 $\pm$ 0.016   | 0.31 $\pm$ 0.005   | 0.33 $\pm$ 0.002   | 0.36 $\pm$ 0.036   | 0.27 $\pm$ 0.036    | 0.34 $\pm$ 0.019   | 0.21 $\pm$ 0.055     | 0.21 $\pm$ 0.099  |
| <b>heptadecenoic (C17:1)</b>    | 0.04 $\pm$ 0.001    | 0.04 $\pm$ 0.001     | 0.05 $\pm$ 0.002   | 0.07 $\pm$ 0.012   | 0.07 $\pm$ 0.002   | 0.1 $\pm$ 0.001    | 0.1 $\pm$ 0.002     | 0.07 $\pm$ 0.001   | 0.07 $\pm$ 0.001     | 0.42 $\pm$ 0.39   |
| <b>Octadecanoic (C18:0)</b>     | 0.61 $\pm$ 0.002    | 0.59 $\pm$ 0.001     | 0.78 $\pm$ 0.008   | 1.03 $\pm$ 0.103   | 1.05 $\pm$ 0.008   | 1.42 $\pm$ 0.103   | 1.45 $\pm$ 0.001    | 1.16 $\pm$ 0.004   | 1.1 $\pm$ 0.001      | 1.31 $\pm$ 0.018  |
| <b>Octadecenoic (18:1)</b>      | 3.12 $\pm$ 0.14     | 2.64 $\pm$ 0.28      | 3.11 $\pm$ 0.46    | 4.11 $\pm$ 0.71    | 4.32 $\pm$ 0.81    | 7.55 $\pm$ 0.7     | 7.26 $\pm$ 0.84     | 5.81 $\pm$ 0.25    | 5.52 $\pm$ 0.25      | 1.68 $\pm$ 0.81   |
| <b>Octadecadienoic (C18:2)</b>  | 0.15 $\pm$ 0.002    | 0.13 $\pm$ 0.0004    | 0.19 $\pm$ 0.004   | 0.28 $\pm$ 0.061   | 0.26 $\pm$ 0.007   | 0.38 $\pm$ 0.004   | 0.34 $\pm$ 0.007    | 0.27 $\pm$ 0.003   | 0.24 $\pm$ 0.002     | 0.08 $\pm$ 0.034  |
| <b>Octadecatrienoic (C18:3)</b> | 0.03 $\pm$ 0.003    | 0.03 $\pm$ 0.001     | 0.04 $\pm$ 0.002   | 0.04 $\pm$ 0.002   | 0.05 $\pm$ 0.002   | 0.05 $\pm$ 0.014   | 0.07 $\pm$ 0.003    | 0.05 $\pm$ 0.005   | 0.05 $\pm$ 0.001     | 0.02 $\pm$ 0.006  |
| <b>Eicosanoic (C20:0)</b>       | 0.01 $\pm$ 0.002    | 0.01 $\pm$ 0.001     | 0.01 $\pm$ 0.001   | 0.03 $\pm$ 0.011   | 0.02 $\pm$ 0.001   | 0.05 $\pm$ 0.006   | 0.03 $\pm$ 0.001    | 0.03 $\pm$ 0.003   | 0.02 $\pm$ 0.001     | 0.01 $\pm$ 0.002  |
| <b>Eicosadienoic (C20:2)</b>    | 0.01 $\pm$ 0.004    | 0.02 $\pm$ 0.002     | 0.02 $\pm$ 0.002   | 0.03 $\pm$ 0.003   | 0.03 $\pm$ 0.005   | 0.04 $\pm$ 0.002   | 0.04 $\pm$ 0.008    | 0.03 $\pm$ 0.001   | 0.03 $\pm$ 0.001     | 0.01 $\pm$ 0.003  |
| <b>Docosanoic (C22:0)</b>       | 0.01 $\pm$ 0.004    | 0.01 $\pm$ 0.002     | 0.01 $\pm$ 0.001   | 0.01 $\pm$ 0.001   | 0.02 $\pm$ 0.002   | 0.02 $\pm$ 0.002   | 0.02 $\pm$ 0.003    | 0.02 $\pm$ 0.001   | 0.02 $\pm$ 0.001     | 0.02 $\pm$ 0.008  |
| <b>Docosenoic (22:2)</b>        | 0.01 $\pm$ 0.001    | 0.01 $\pm$ 0.002     | 0.01 $\pm$ 0.001   | 0.03 $\pm$ 0.002   | 0.02 $\pm$ 0.004   | 0.03 $\pm$ 0.003   | 0.03 $\pm$ 0.005    | 0.02 $\pm$ 0.002   | 0.02 $\pm$ 0.003     | 0.03 $\pm$ 0.003  |
| <b>Tricosanoic (C23:0)</b>      | 0.004 $\pm$ 0.0001  | 0.01 $\pm$ 0.002     | 0.01 $\pm$ 0.002   | 0.01 $\pm$ 0.002   | 0.02 $\pm$ 0.008   | 0.01 $\pm$ 0.0002  | 0.02 $\pm$ 0.001    | 0.02 $\pm$ 0.002   | 0.02 $\pm$ 0.003     | 0.03 $\pm$ 0.003  |
| <b>Tetracosanoic (C24:0)</b>    | 0.01 $\pm$ 0.001    | 0.01 $\pm$ 0.001     | 0.01 $\pm$ 0.001   | 0.02 $\pm$ 0.002   | 0.02 $\pm$ 0.002   | 0.02 $\pm$ 0.003   | 0.02 $\pm$ 0.003    | 0.02 $\pm$ 0.002   | 0.02 $\pm$ 0.003     | 0.06 $\pm$ 0.003  |
| <b>Tetracosenoic (C24:1)</b>    | 0.03 $\pm$ 0.003    | 0.04 $\pm$ 0.001     | 0.04 $\pm$ 0.005   | 0.05 $\pm$ 0.001   | 0.06 $\pm$ 0.009   | 0.07 $\pm$ 0.011   | 0.08 $\pm$ 0.013    | 0.07 $\pm$ 0.006   | 0.08 $\pm$ 0.001     | 0.09 $\pm$ 0.012  |
| <b>Pentacosanoic (C25:0)</b>    | 0.02 $\pm$ 0.002    | 0.04 $\pm$ 0.001     | 0.03 $\pm$ 0.003   | 0.03 $\pm$ 0.007   | 0.05 $\pm$ 0.008   | 0.05 $\pm$ 0.004   | 0.08 $\pm$ 0.012    | 0.06 $\pm$ 0.004   | 0.06 $\pm$ 0.007     | 0.04 $\pm$ 0.002  |
| <b>Hexacosanoic (26:0)</b>      | 0.001 $\pm$ 0.00003 | 0.001 $\pm$ 0.000001 | 0.001 $\pm$ 0.0001 | 0.001 $\pm$ 0.0004 | 0.001 $\pm$ 0.0001 | 0.002 $\pm$ 0.0001 | 0.001 $\pm$ 0.00002 | 0.002 $\pm$ 0.0002 | 0.002 $\pm$ 0.000003 | 0.002 $\pm$ 0.00  |

**Table S5.** Month wise variations in the mineral content of *C. antennina*. Values are average  $\pm$ SE values are given in table, n= 3.

|           | June'19                  | July'19                 | Aug'19                   | Sep'19                   | Oct'19                   | Nov'19                  | Dec'19                   | Jan'20                   | Feb'20                   | Mar'20                   |
|-----------|--------------------------|-------------------------|--------------------------|--------------------------|--------------------------|-------------------------|--------------------------|--------------------------|--------------------------|--------------------------|
| <b>Na</b> | 16644.69 $\pm$<br>119.29 | 17270.55 $\pm$<br>93.62 | 20708.71 $\pm$<br>472.87 | 19189.03 $\pm$<br>560.61 | 21830.68 $\pm$<br>197.94 | 14131.35 $\pm$<br>85.83 | 15824.69 $\pm$<br>164.75 | 18998.92 $\pm$<br>489.94 | 19533.2 $\pm$ 2<br>94.64 | 22476.27 $\pm$<br>168.66 |
| <b>Rb</b> | 4.19 $\pm$ 0.07          | 4.32 $\pm$ 0.08         | 5.2 $\pm$ 0.26           | 5.15 $\pm$ 0.24          | 5.89 $\pm$ 0.09          | 3.54 $\pm$ 0.06         | 3.96 $\pm$ 0.14          | 4.93 $\pm$ 0.24          | 5.25 $\pm$ 0.16          | 5.89 $\pm$ 0.09          |
| <b>Sr</b> | 837.14 $\pm$ 6.9<br>2    | 860.49 $\pm$ 7.7<br>4   | 1036.15 $\pm$ 1<br>4.82  | 855.12 $\pm$ 13.<br>05   | 844.34 $\pm$ 24          | 707.35 $\pm$ 6.0<br>9   | 790.27 $\pm$ 2.9<br>6    | 995.84 $\pm$ 13.<br>01   | 1079.11 $\pm$ 5.<br>33   | 1198.97 $\pm$ 1<br>3.35  |
| <b>Cd</b> | 0.25 $\pm$ 0.01          | 0.26 $\pm$ 0.01         | 0.31 $\pm$ 0.01          | 0.31 $\pm$ 0.01          | 0.35 $\pm$ 0.01          | 0.21 $\pm$ 0            | 0.24 $\pm$ 0             | 0.29 $\pm$ 0.01          | 0.31 $\pm$ 0.01          | 0.35 $\pm$ 0.01          |
| <b>In</b> | 0.32 $\pm$ 0.01          | 0.32 $\pm$ 0.01         | 0.39 $\pm$ 0.01          | 0.44 $\pm$ 0.02          | 0.51 $\pm$ 0.02          | 0.27 $\pm$ 0.01         | 0.3 $\pm$ 0.01           | 0.4 $\pm$ 0.02           | 0.46 $\pm$ 0.02          | 0.49 $\pm$ 0.02          |
| <b>Cs</b> | 0.47 $\pm$ 0             | 0.49 $\pm$ 0            | 0.59 $\pm$ 0.01          | 0.56 $\pm$ 0.01          | 0.64 $\pm$ 0.01          | 0.4 $\pm$ 0             | 0.45 $\pm$ 0.01          | 0.55 $\pm$ 0.01          | 0.57 $\pm$ 0             | 0.65 $\pm$ 0.01          |
| <b>Ba</b> | 68.23 $\pm$ 0.5          | 69.26 $\pm$ 0.68        | 84.05 $\pm$ 2.76         | 95.94 $\pm$ 3.28         | 110.96 $\pm$ 1.0<br>2    | 57.29 $\pm$ 0.49        | 63.88 $\pm$ 1.3          | 85.71 $\pm$ 2.84         | 98.52 $\pm$ 2.03         | 105.15 $\pm$ 0.6<br>6    |
| <b>Pb</b> | 4.39 $\pm$ 0.16          | 4.44 $\pm$ 0.17         | 5.39 $\pm$ 0.36          | 6.4 $\pm$ 0.46           | 7.44 $\pm$ 0.36          | 3.68 $\pm$ 0.14         | 4.1 $\pm$ 0.22           | 5.62 $\pm$ 0.39          | 6.59 $\pm$ 0.39          | 6.95 $\pm$ 0.3           |
| <b>Bi</b> | 0.12 $\pm$ 0.01          | 0.13 $\pm$ 0.01         | 0.15 $\pm$ 0.01          | 0.15 $\pm$ 0.01          | 0.17 $\pm$ 0.01          | 0.1 $\pm$ 0.01          | 0.12 $\pm$ 0.01          | 0.14 $\pm$ 0.01          | 0.15 $\pm$ 0.01          | 0.17 $\pm$ 0.01          |
| <b>Mg</b> | 2606.6 $\pm$ 27.<br>04   | 2693.23 $\pm$ 2<br>6.31 | 3238.13 $\pm$ 1<br>22.48 | 3132.49 $\pm$ 9<br>3.77  | 2908.71 $\pm$ 2<br>1.45  | 2874.93 $\pm$ 2<br>0.19 | 3138.07 $\pm$ 5<br>9.91  | 3033.63 $\pm$ 1<br>02.97 | 3194.22 $\pm$ 4<br>2.17  | 3614.77 $\pm$ 2<br>4.01  |
| <b>Al</b> | 84.98 $\pm$ 1.12         | 94.64 $\pm$ 0.07        | 124.47 $\pm$ 1.2<br>9    | 86.88 $\pm$ 7.63         | 116.3 $\pm$ 25.3<br>8    | 143.49 $\pm$ 1.6<br>3   | 149.64 $\pm$ 17.<br>83   | 127.6 $\pm$ 1.13         | 147.52 $\pm$ 2.1<br>1    | 157.05 $\pm$ 2.8<br>9    |
| <b>Ca</b> | 3215.31 $\pm$ 2<br>6.67  | 3320.71 $\pm$ 3<br>3.85 | 3989.7 $\pm$ 71.<br>2    | 3877.69 $\pm$ 7<br>9.34  | 4432.13 $\pm$ 2<br>9.13  | 2723.34 $\pm$ 2<br>5.16 | 3046 $\pm$ 23.5<br>6     | 3746.38 $\pm$ 7<br>1.47  | 3957.06 $\pm$ 2<br>8.15  | 4472.17 $\pm$ 3<br>3.93  |
| <b>V</b>  | 1.05 $\pm$ 0.02          | 1.07 $\pm$ 0.02         | 1.29 $\pm$ 0.06          | 1.38 $\pm$ 0.08          | 1.59 $\pm$ 0.04          | 0.88 $\pm$ 0.02         | 0.98 $\pm$ 0.03          | 1.27 $\pm$ 0.07          | 1.42 $\pm$ 0.06          | 1.54 $\pm$ 0.03          |
| <b>Cr</b> | 9.32 $\pm$ 0.08          | 9.84 $\pm$ 0.14         | 11.68 $\pm$ 0.07         | 8.78 $\pm$ 0.17          | 9.79 $\pm$ 0.09          | 7.98 $\pm$ 0.09         | 8.97 $\pm$ 0.03          | 9.74 $\pm$ 0.11          | 8.84 $\pm$ 0.07          | 11.11 $\pm$ 0.11         |
| <b>Mn</b> | 56.24 $\pm$ 0.43         | 58.47 $\pm$ 0.66        | 70.02 $\pm$ 2.4          | 63.5 $\pm$ 0.99          | 72.11 $\pm$ 1.31         | 47.8 $\pm$ 0.35         | 53.54 $\pm$ 1.23         | 63.58 $\pm$ 1.55         | 64.57 $\pm$ 0.45         | 74.94 $\pm$ 0.73         |
| <b>Fe</b> | 162.26 $\pm$ 2.3<br>7    | 167.26 $\pm$ 4.1<br>4   | 201.08 $\pm$ 7.7<br>2    | 199.47 $\pm$ 5.6         | 228.49 $\pm$ 2.5<br>5    | 137.3 $\pm$ 2.56        | 153.47 $\pm$ 4.8<br>6    | 190.74 $\pm$ 6.3         | 203.79 $\pm$ 3.7<br>9    | 228.62 $\pm$ 3.1<br>9    |
| <b>Co</b> | 0.25 $\pm$ 0.01          | 0.25 $\pm$ 0.01         | 0.31 $\pm$ 0.02          | 0.36 $\pm$ 0.02          | 0.41 $\pm$ 0.01          | 0.21 $\pm$ 0            | 0.23 $\pm$ 0.01          | 0.32 $\pm$ 0.02          | 0.36 $\pm$ 0.02          | 0.39 $\pm$ 0.01          |
| <b>Ni</b> | 2.33 $\pm$ 0.09          | 2.43 $\pm$ 0.13         | 2.9 $\pm$ 0.14           | 2.57 $\pm$ 0.13          | 2.92 $\pm$ 0.12          | 1.98 $\pm$ 0.09         | 2.22 $\pm$ 0.11          | 2.6 $\pm$ 0.12           | 2.62 $\pm$ 0.11          | 3.07 $\pm$ 0.13          |
| <b>Cu</b> | 6.76 $\pm$ 0.08          | 7.11 $\pm$ 0.18         | 8.46 $\pm$ 0.38          | 6.73 $\pm$ 0.22          | 7.55 $\pm$ 0.02          | 5.78 $\pm$ 0.1          | 6.49 $\pm$ 0.23          | 7.23 $\pm$ 0.28          | 6.8 $\pm$ 0.11           | 8.33 $\pm$ 0.08          |
| <b>Zn</b> | 62.59 $\pm$ 0.51         | 63.7 $\pm$ 0.45         | 77.13 $\pm$ 2.18         | 86.04 $\pm$ 2.74         | 99.43 $\pm$ 1.76         | 52.62 $\pm$ 0.4         | 58.68 $\pm$ 1.09         | 77.7 $\pm$ 2.31          | 88.32 $\pm$ 2.06         | 95.03 $\pm$ 1.3          |
| <b>Ga</b> | 0.06 $\pm$ 0             | 0.06 $\pm$ 0            | 0.07 $\pm$ 0             | 0.07 $\pm$ 0             | 0.08 $\pm$ 0             | 0.05 $\pm$ 0            | 0.05 $\pm$ 0             | 0.07 $\pm$ 0             | 0.07 $\pm$ 0             | 0.08 $\pm$ 0             |
| <b>K</b>  | 234.41 $\pm$ 15.<br>76   | 258.22 $\pm$ 8.6<br>3   | 330.6 $\pm$ 6.62         | 328.8 $\pm$ 10.2<br>2    | 355.67 $\pm$ 17.<br>79   | 205.26 $\pm$ 10.<br>16  | 245.34 $\pm$ 2.7<br>4    | 314 $\pm$ 7.56           | 325.94 $\pm$ 11.<br>2    | 350.58 $\pm$ 17.<br>17   |
| <b>As</b> | 22.81 $\pm$ 0.13         | 23.59 $\pm$ 0.26        | 28.31 $\pm$ 0.46         | 27.14 $\pm$ 0.25         | 31 $\pm$ 0.38            | 19.34 $\pm$ 0.16        | 21.63 $\pm$ 0.22         | 26.41 $\pm$ 0.34         | 27.69 $\pm$ 0.09         | 31.46 $\pm$ 0.32         |
| <b>Se</b> | 4.24 $\pm$ 0.05          | 4.34 $\pm$ 0.06         | 5.24 $\pm$ 0.22          | 5.59 $\pm$ 0.23          | 6.43 $\pm$ 0.1           | 3.58 $\pm$ 0.05         | 3.99 $\pm$ 0.12          | 5.16 $\pm$ 0.22          | 5.72 $\pm$ 0.16          | 6.25 $\pm$ 0.08          |

**Table S6.** Month wise variations in the level of antioxidant content of *C. antennina*.  
Values are average  $\pm$ SE values are given in table, n= 3.

|                                                       | June'19          | July'19          | Aug'19           | Sep'19           | Oct'19            | Nov'19           | Dec'19           | Jan'20           | Feb'20           | Mar'20           |
|-------------------------------------------------------|------------------|------------------|------------------|------------------|-------------------|------------------|------------------|------------------|------------------|------------------|
| <b>GPX (<math>\mu</math>mol NADPH/mg protein/min)</b> | 0.31 $\pm$ 0.04  | 0.09 $\pm$ 0     | 0.16 $\pm$ 0.03  | 0.25 $\pm$ 0.05  | 0.37 $\pm$ 0.02   | 0.25 $\pm$ 0.02  | 1.61 $\pm$ 1.2   | 0.81 $\pm$ 0.19  | 0.19 $\pm$ 0.01  | 0.22 $\pm$ 0.02  |
| <b>GST (<math>\mu</math>mol/min/mg protein)</b>       | 0.28 $\pm$ 0     | 0.24 $\pm$ 0.04  | 0.27 $\pm$ 0.02  | 0.28 $\pm$ 0.01  | 0.2 $\pm$ 0.01    | 0.21 $\pm$ 0     | 0.23 $\pm$ 0.03  | 0.21 $\pm$ 0.03  | 0.17 $\pm$ 0.06  | 0.34 $\pm$ 0.06  |
| <b>GR (<math>\mu</math>mol/min/mg protein)</b>        | 0.31 $\pm$ 0.07  | 0.35 $\pm$ 0.04  | 0.58 $\pm$ 0.03  | 0.44 $\pm$ 0.02  | 0.55 $\pm$ 0.01   | 0.36 $\pm$ 0.02  | 0.47 $\pm$ 0.03  | 1.21 $\pm$ 0.14  | 1.89 $\pm$ 0.26  | 1.41 $\pm$ 0.06  |
| <b>DHAR (<math>\mu</math>mol/min/mg protein)</b>      | 0.46 $\pm$ 0.09  | 0.39 $\pm$ 0.12  | 0.49 $\pm$ 0.08  | 0.43 $\pm$ 0.03  | 0.5 $\pm$ 0.08    | 0.37 $\pm$ 0.1   | 0.48 $\pm$ 0.03  | 0.51 $\pm$ 0.1   | 0.77 $\pm$ 0.1   | 0.81 $\pm$ 0.19  |
| <b>MDHAR (<math>\mu</math>mol/min/mg protein)</b>     | 0.17 $\pm$ 0.03  | 0.22 $\pm$ 0.01  | 0.19 $\pm$ 0.04  | 0.13 $\pm$ 0.02  | 0.17 $\pm$ 0.02   | 0.19 $\pm$ 0.03  | 0.13 $\pm$ 0.03  | 0.21 $\pm$ 0.06  | 0.13 $\pm$ 0.04  | 0.17 $\pm$ 0.04  |
| <b>APX (<math>\mu</math>mol/min/mg protein)</b>       | 1.09 $\pm$ 0.17  | 2.3 $\pm$ 0.16   | 1.01 $\pm$ 0.12  | 1 $\pm$ 0.15     | 1.2 $\pm$ 0.15    | 1.7 $\pm$ 0.01   | 1.66 $\pm$ 0.13  | 1.84 $\pm$ 0.05  | 2.45 $\pm$ 0.22  | 1.94 $\pm$ 0.19  |
| <b>CAT (<math>\mu</math>mol/min/mg protein)</b>       | 31.53 $\pm$ 1.87 | 24.83 $\pm$ 3.62 | 24 $\pm$ 9.17    | 25.08 $\pm$ 2.98 | 22.37 $\pm$ 2.66  | 23.33 $\pm$ 1.46 | 51.9 $\pm$ 4.27  | 36.42 $\pm$ 2.66 | 92.13 $\pm$ 10.6 | 69 $\pm$ 8.22    |
| <b>POX (<math>\mu</math>mol/min/mg protein)</b>       | 1.73 $\pm$ 0.18  | 1.52 $\pm$ 0.32  | 1.55 $\pm$ 0.31  | 1.4 $\pm$ 0.28   | 1.64 $\pm$ 0.12   | 1.75 $\pm$ 0.29  | 2.73 $\pm$ 0.28  | 3.17 $\pm$ 0.45  | 3.61 $\pm$ 0.41  | 4.13 $\pm$ 0.44  |
| <b>ASC (<math>\mu</math>mol/gFW)</b>                  | 1.81 $\pm$ 0.05  | 2.13 $\pm$ 0.62  | 1.32 $\pm$ 0.04  | 1.23 $\pm$ 0.31  | 2.44 $\pm$ 0.21   | 2.88 $\pm$ 0.13  | 2.9 $\pm$ 0.39   | 2.69 $\pm$ 0.41  | 3.08 $\pm$ 0.34  | 3.13 $\pm$ 0.37  |
| <b>TASC (<math>\mu</math>mol/gFW)</b>                 | 3.34 $\pm$ 0.51  | 2.89 $\pm$ 0.82  | 2.14 $\pm$ 0.22  | 2.24 $\pm$ 0.46  | 3.77 $\pm$ 0.5    | 4.79 $\pm$ 0.56  | 4.05 $\pm$ 0.11  | 6.38 $\pm$ 1.07  | 5.94 $\pm$ 0.32  | 5.93 $\pm$ 0.96  |
| <b>DHA (<math>\mu</math>mol/gFW)</b>                  | 1.54 $\pm$ 0.47  | 0.76 $\pm$ 0.28  | 0.82 $\pm$ 0.23  | 1.01 $\pm$ 0.2   | 1.33 $\pm$ 0.31   | 1.91 $\pm$ 0.68  | 1.15 $\pm$ 0.28  | 3.69 $\pm$ 0.72  | 2.85 $\pm$ 0.66  | 2.8 $\pm$ 0.62   |
| <b>GSH (<math>\mu</math>mol/gFW)</b>                  | 0.19 $\pm$ 0.05  | 0.28 $\pm$ 0.07  | 0.11 $\pm$ 0.02  | 0.17 $\pm$ 0.06  | 0.26 $\pm$ 0.07   | 0.29 $\pm$ 0.05  | 0.24 $\pm$ 0.04  | 0.4 $\pm$ 0.06   | 0.5 $\pm$ 0.07   | 0.37 $\pm$ 0.05  |
| <b>TGSH (<math>\mu</math>mol/gFW)</b>                 | 0.33 $\pm$ 0.08  | 0.34 $\pm$ 0.08  | 0.15 $\pm$ 0.02  | 0.24 $\pm$ 0.06  | 0.38 $\pm$ 0.02   | 0.37 $\pm$ 0.1   | 0.28 $\pm$ 0.04  | 0.55 $\pm$ 0.08  | 0.65 $\pm$ 0.13  | 0.57 $\pm$ 0.16  |
| <b>GSSG (<math>\mu</math>mol/gFW)</b>                 | 0.14 $\pm$ 0.03  | 0.06 $\pm$ 0.03  | 0.04 $\pm$ 0     | 0.07 $\pm$ 0.01  | 0.13 $\pm$ 0.07   | 0.08 $\pm$ 0.06  | 0.05 $\pm$ 0.01  | 0.15 $\pm$ 0.03  | 0.15 $\pm$ 0.07  | 0.2 $\pm$ 0.12   |
| <b>Polyphenol mg gallic acid/g FW</b>                 | 11.61 $\pm$ 4.4  | 12.63 $\pm$ 3.4  | 12.65 $\pm$ 4.07 | 8.39 $\pm$ 2.71  | 11.18 $\pm$ 3.24  | 26.62 $\pm$ 3.33 | 13.13 $\pm$ 0.38 | 23.21 $\pm$ 0.35 | 20.36 $\pm$ 6.54 | 22.23 $\pm$ 6.35 |
| <b>FRAP (<math>\mu</math>mol trolox/g FW)</b>         | 14.65 $\pm$ 1.01 | 26.24 $\pm$ 8.06 | 18.98 $\pm$ 5.78 | 16.94 $\pm$ 9.2  | 29.09 $\pm$ 10.88 | 34.12 $\pm$ 3.12 | 34.02 $\pm$ 6.55 | 31.62 $\pm$ 5.43 | 37.02 $\pm$ 4.47 | 38.47 $\pm$ 5.38 |
| <b>MDA (nmol MDA/g FW)</b>                            | 1.93 $\pm$ 0.17  | 3.23 $\pm$ 1.05  | 2.32 $\pm$ 0.6   | 1.69 $\pm$ 0.76  | 2.92 $\pm$ 1.08   | 6.2 $\pm$ 0.64   | 8.91 $\pm$ 1.01  | 4.52 $\pm$ 0.75  | 8.42 $\pm$ 0.61  | 6.1 $\pm$ 1.14   |

|                                   |              |               |              |             |              |               |              |              |                |              |
|-----------------------------------|--------------|---------------|--------------|-------------|--------------|---------------|--------------|--------------|----------------|--------------|
| Flavonoids<br>(mg quercetin/g FW) | 0.21±0.01    | 0.26±0.08     | 0.19±0.05    | 0.18±0.05   | 0.23±0.06    | 0.4±0.08      | 0.38±0.03    | 0.34±0.04    | 0.47±0.01      | 0.46±0.05    |
| Tocopherols<br>(mg/g FW)          | 2±0.29       | 3±0.54        | 2.55±0.02    | 2.08±0.6    | 2.85±0.53    | 5.76±0.44     | 7.84±0.71    | 8.71±2.18    | 8.54±0.35      | 8.18±0.6     |
| SOD<br>(unit/min/mg protein)      | 840.98±11.35 | 466.08±187.77 | 632.61±99.51 | 822.8±52.72 | 548.11±87.05 | 630.07±182.24 | 1165.3±52.38 | 1075.84±90.7 | 1148.14±108.02 | 1193.87±3.78 |
